# Supplementary material for: Novel Pd(ii) pincer complexes bearing salicylaldimine-based benzothiazole derivatives: synthesis, structural characterization, DNA/BSA binding, and biological evaluation
Source: Royal Society of Chemistry journal article supplement (doi:10.1039/d3nj00458a), 2023-01-01
Supplement: d3nj00458a1.pdf [file d3nj00458a1.pdf]

## Electronic Supplementary Information

### **Novel Pd(II) pincer complexes bearing salicylaldimine–based benzothiazole derivatives: synthesis, structural characterization, DNA/BSA binding, and biological evaluation**

Sutthida Wongsuwan,<sup>a</sup> Jaruwan Chatwichien,<sup>b,c</sup> Weekit Sirisaksoontorn,<sup>a</sup> Kittipong Chainok,<sup>d</sup> Apisit Songsasen\*<sup>a</sup> and Ratanon Chotima\*<sup>e</sup>

<sup>a</sup>Department of Chemistry, Faculty of Science, Kasetsart University, 10900 Bangkok, Thailand

<sup>b</sup>Program in Chemical Sciences, Chulabhorn Graduate Institute, Chulabhorn Royal Academy, 10210 Bangkok, Thailand

<sup>c</sup>Center of Excellence on Environmental Health and Toxicology (EHT), OPS, MHESI, Thailand

<sup>d</sup>Thammasat University Research Unit in Multifunctional Crystalline Materials and Applications (TU–MCMA), Faculty of Science and Technology, Thammasat University, 12121 Pathum Thani, Thailand

<sup>e</sup>Department of Chemistry, Faculty of Science, Naresuan University, 65000 Phitsanulok, Thailand.

Corresponding authors:

E–mail: R.C. (ratanonc@nu.ac.th) and A.S. (fsciass@ku.ac.th)

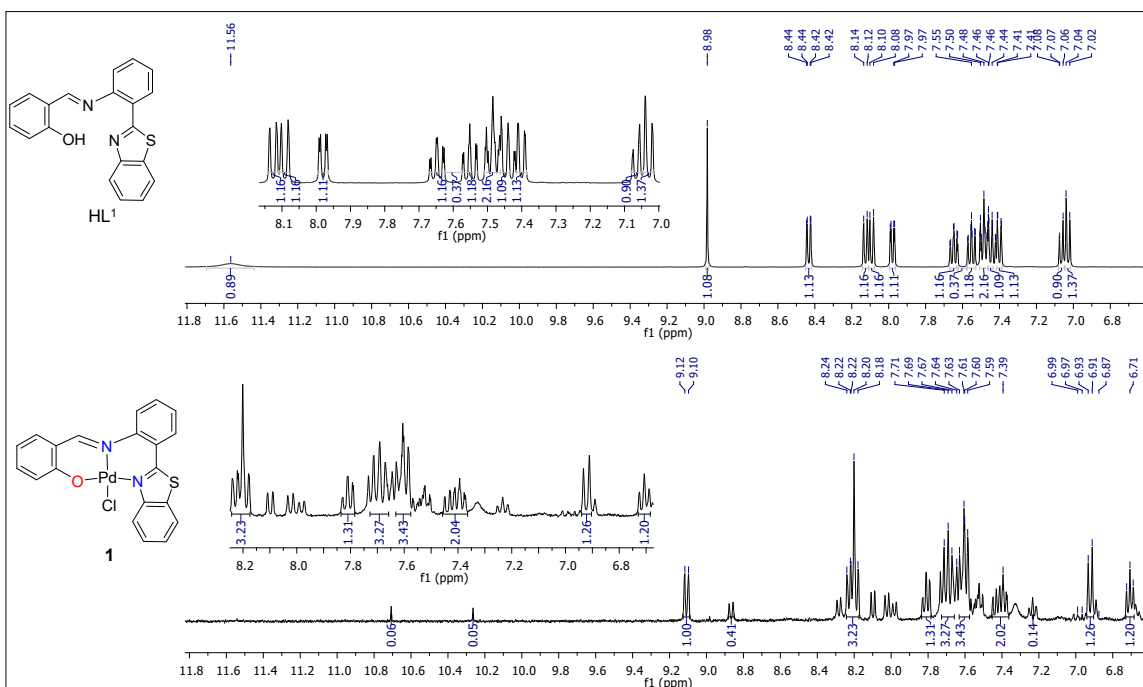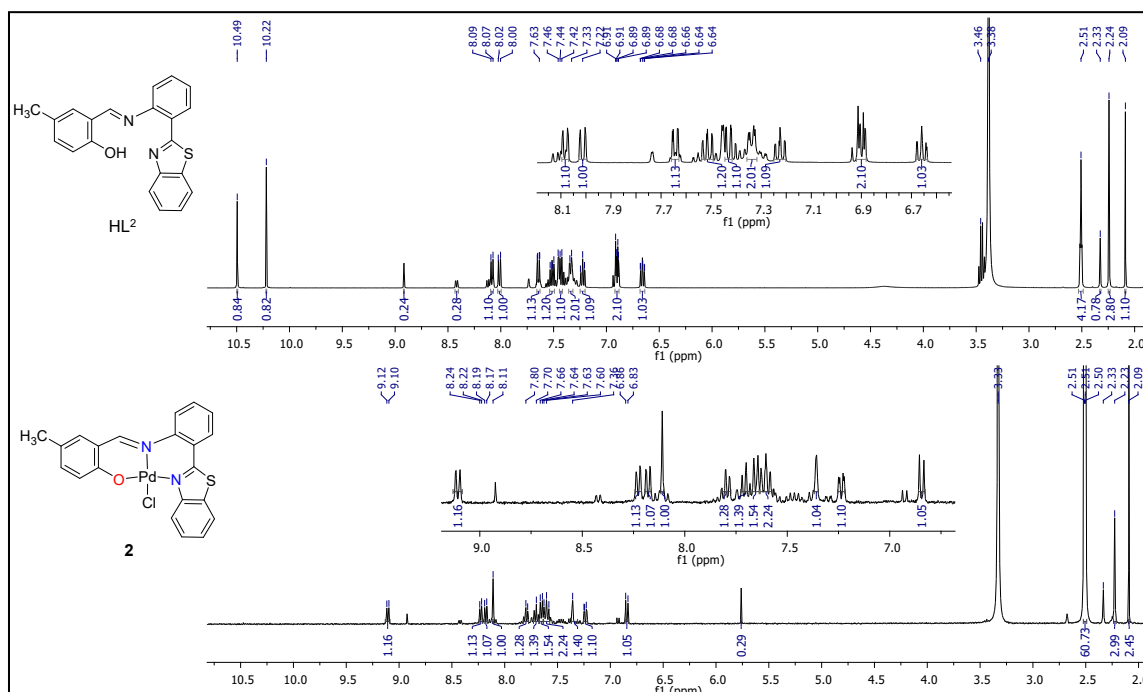

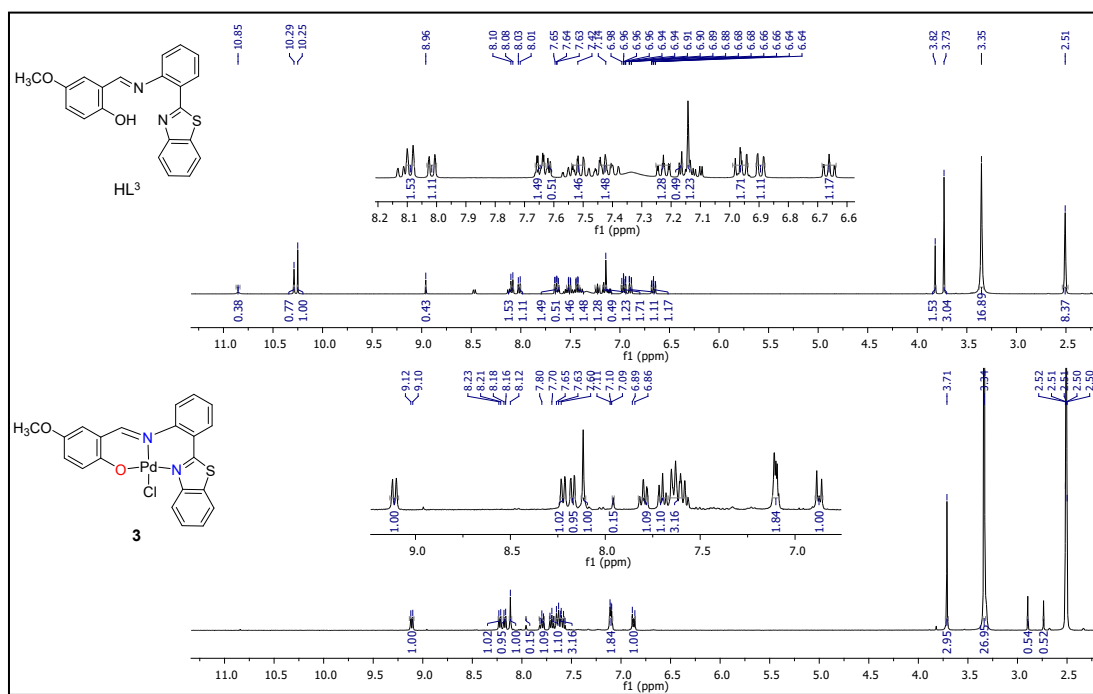

Fig. S3  $^1\text{H}$  NMR (400 MHz,  $\text{DMSO}-d_6$ ) spectra of ligand  $\text{HL}^3$  and their  $\text{Pd}(\text{II})$  complex **3**.

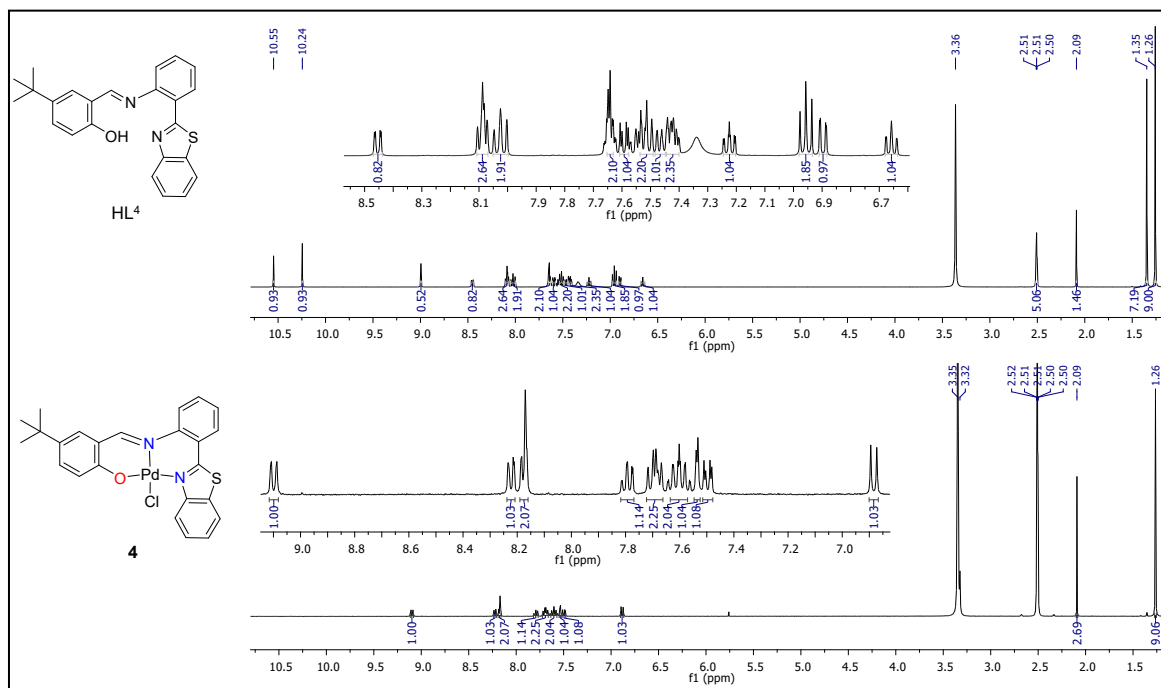

Fig. S4  $^1\text{H}$  NMR (400 MHz,  $\text{DMSO}-d_6$ ) spectra of ligand  $\text{HL}^4$  and  $\text{Pd}(\text{II})$  complex **4**.

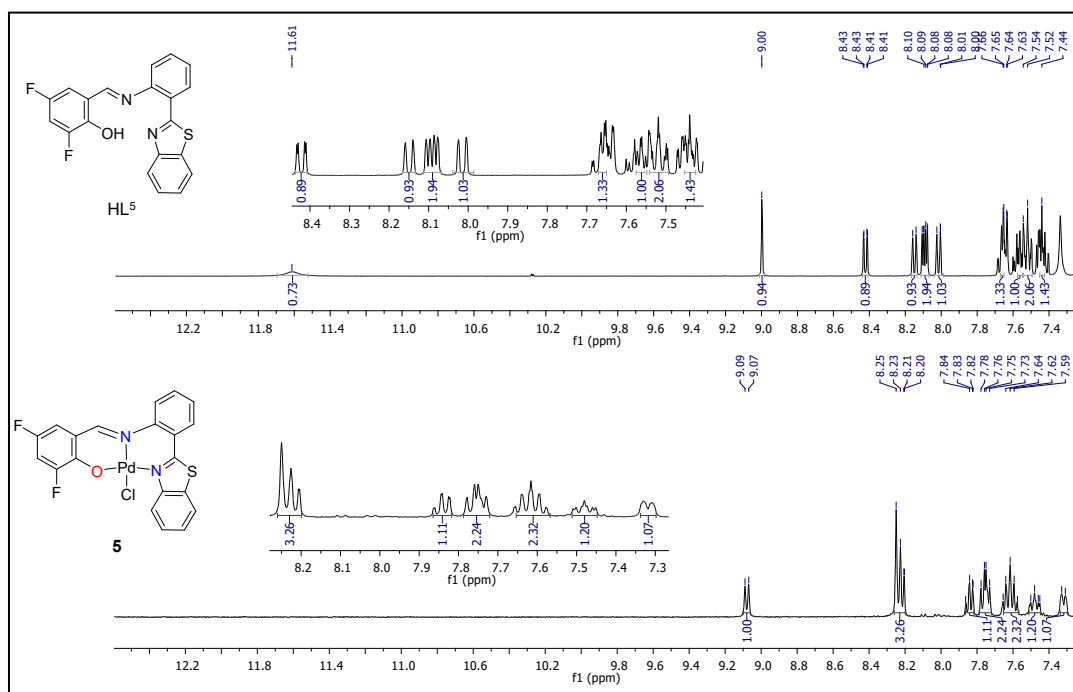

**Fig. S5** <sup>1</sup>H NMR (400 MHz, DMSO-*d*<sub>6</sub>) spectra of ligand HL<sup>5</sup> and Pd(II) complex **5**.

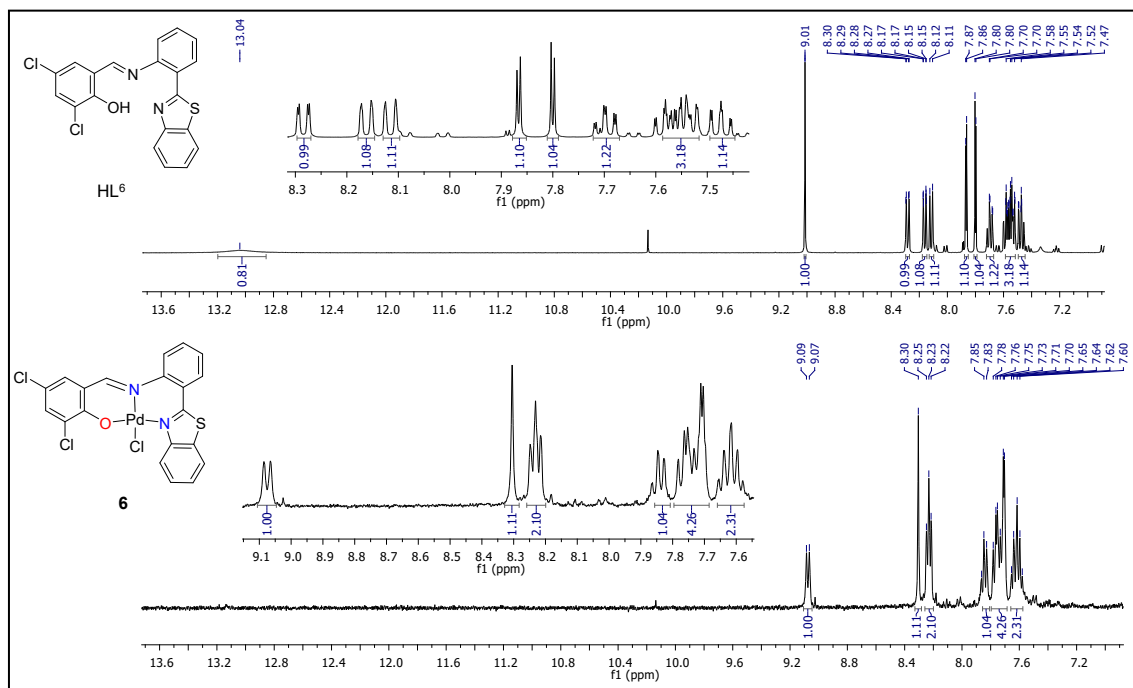

**Fig. S6** <sup>1</sup>H NMR (400 MHz, DMSO-*d*<sub>6</sub>) spectra of ligand HL<sup>6</sup> and Pd(II) complex **6**.

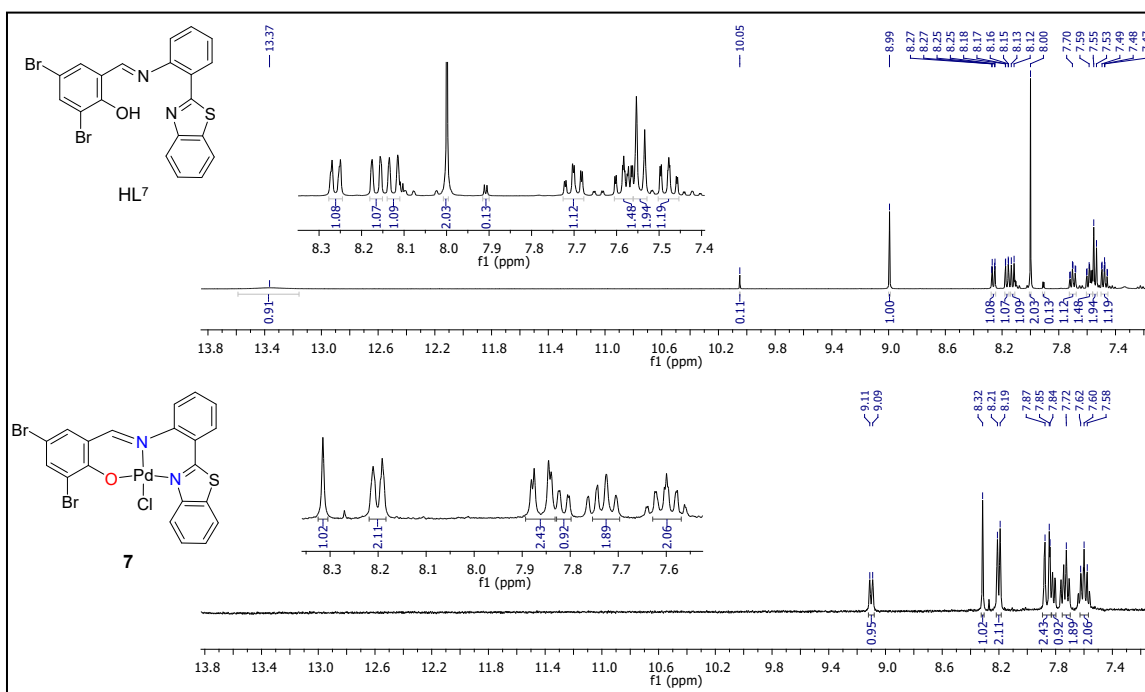

**Fig. S7**  $^1\text{H}$  NMR (400 MHz,  $\text{DMSO}-d_6$ ) spectra of ligand HL<sup>7</sup> and Pd(II) complex 7.

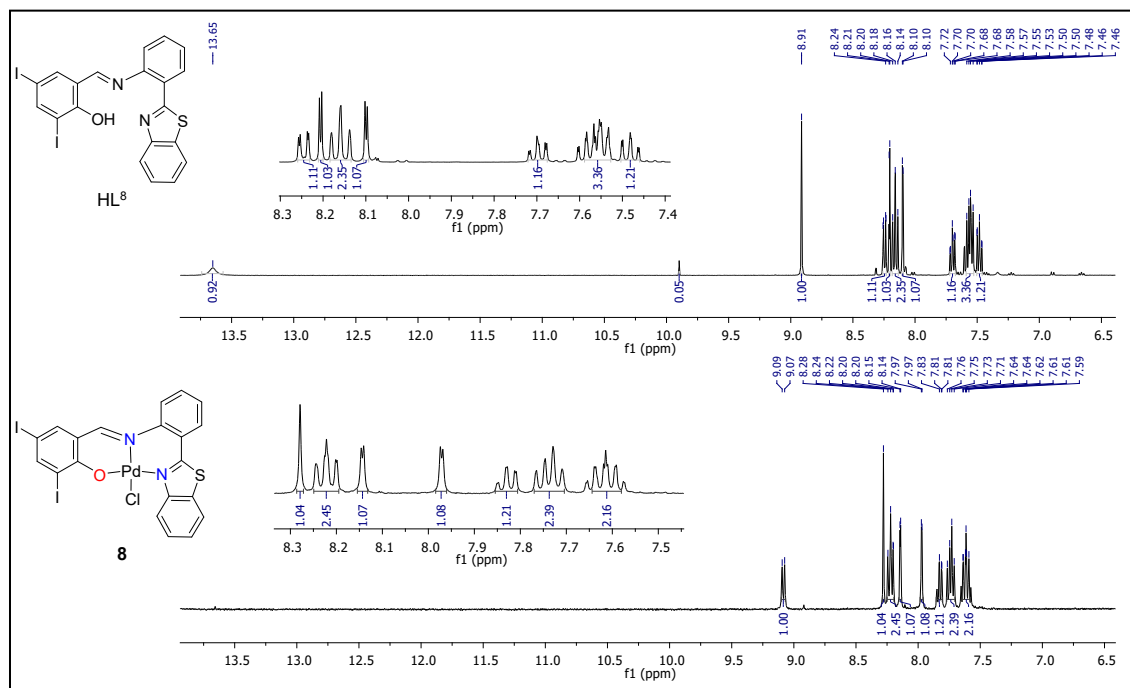

**Fig. S8**  $^1\text{H}$  NMR (400 MHz,  $\text{DMSO}-d_6$ ) spectra of ligand HL<sup>8</sup> and Pd(II) complex 8.

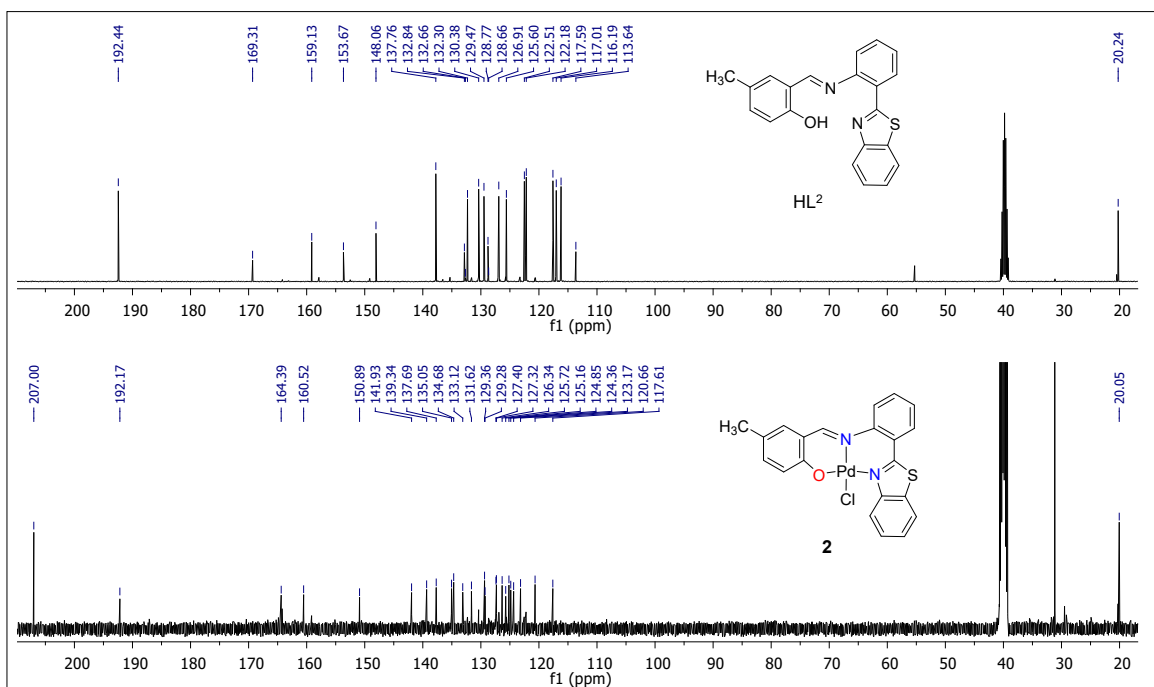

**Fig. S9**  $^{13}\text{C}$  NMR (100 MHz,  $\text{DMSO}-d_6$ ) spectra of ligand  $\text{HL}^2$  and Pd(II) complex **2**.

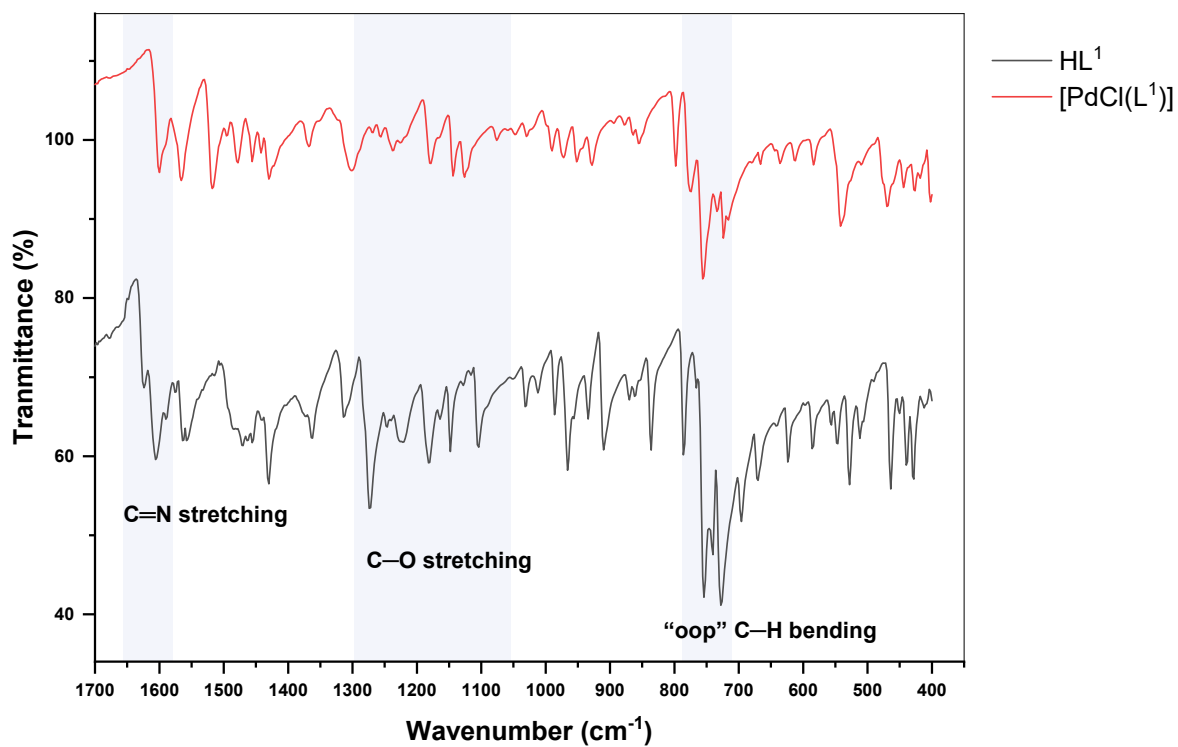

**Fig. S10** FT-IR (ATR) spectra of ligand  $\text{HL}^1$  and Pd(II) complex **1**.

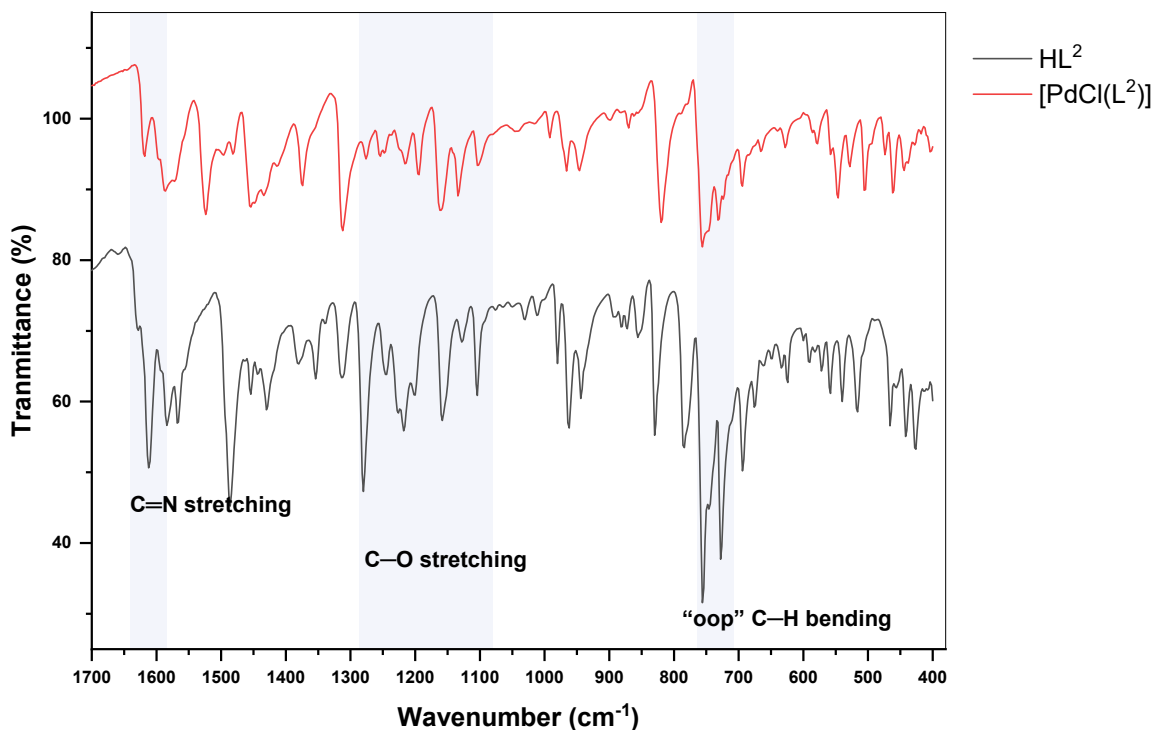

Fig. S11 FT-IR (ATR) spectra of ligand  $HL^2$  and Pd(II) complex **2**.

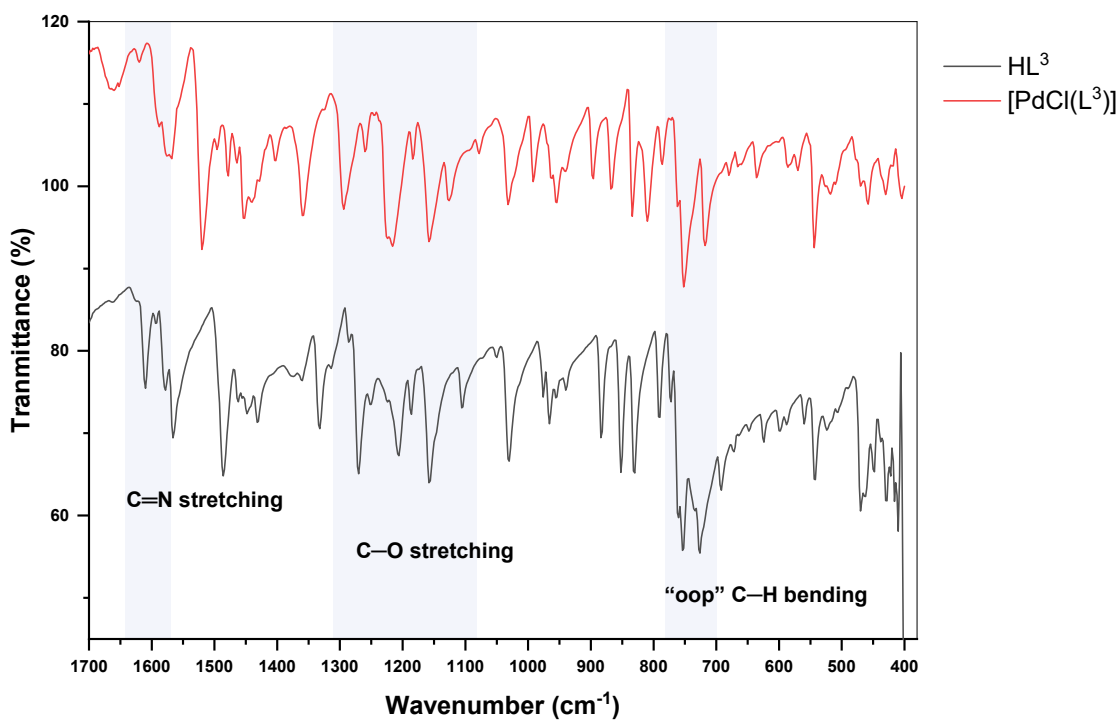

Fig. S12 FT-IR (ATR) spectra of ligand  $HL^3$  and Pd(II) complex **3**.

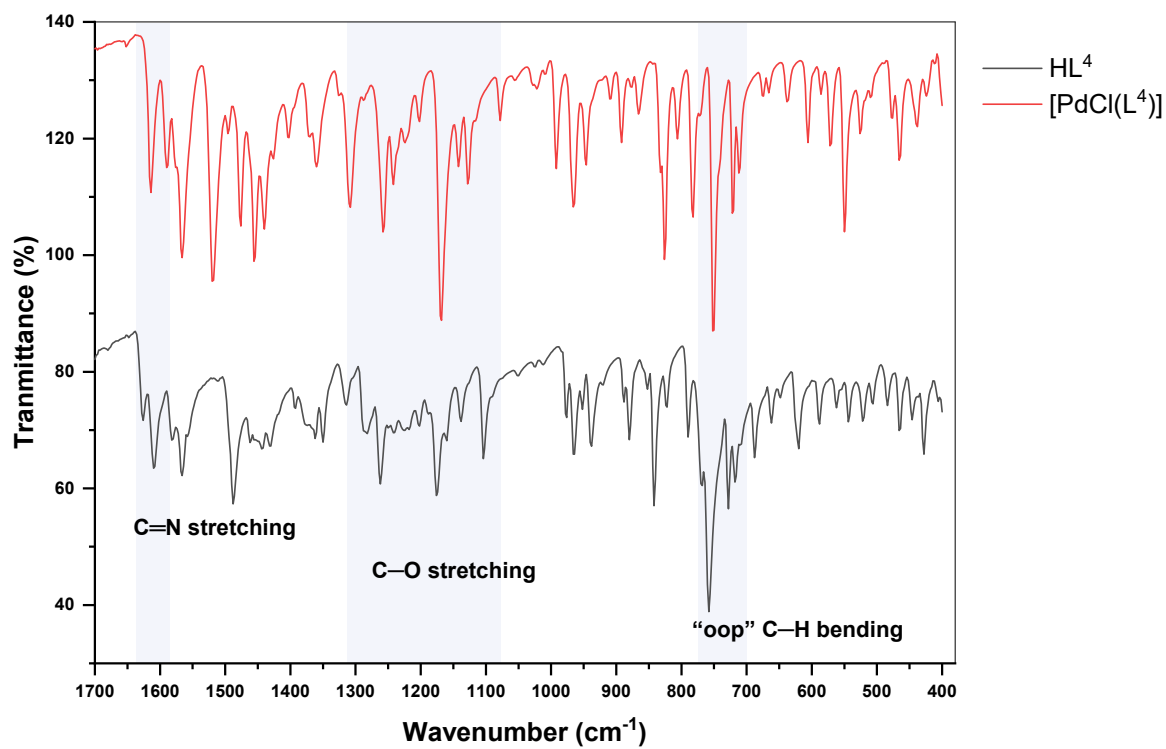

Fig. S13 FT-IR (ATR) spectra of ligand  $HL^4$  and Pd(II) complex 4.

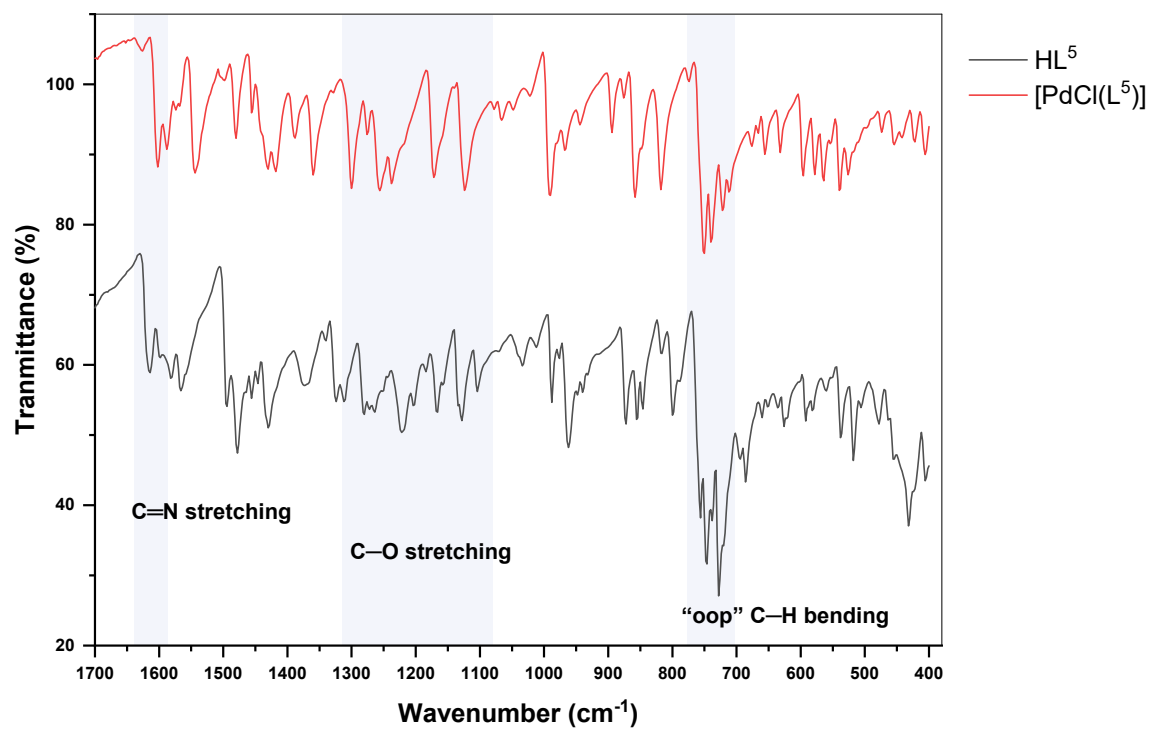

Fig. S14 FT-IR (ATR) spectra of ligand  $HL^5$  and Pd(II) complex 5.



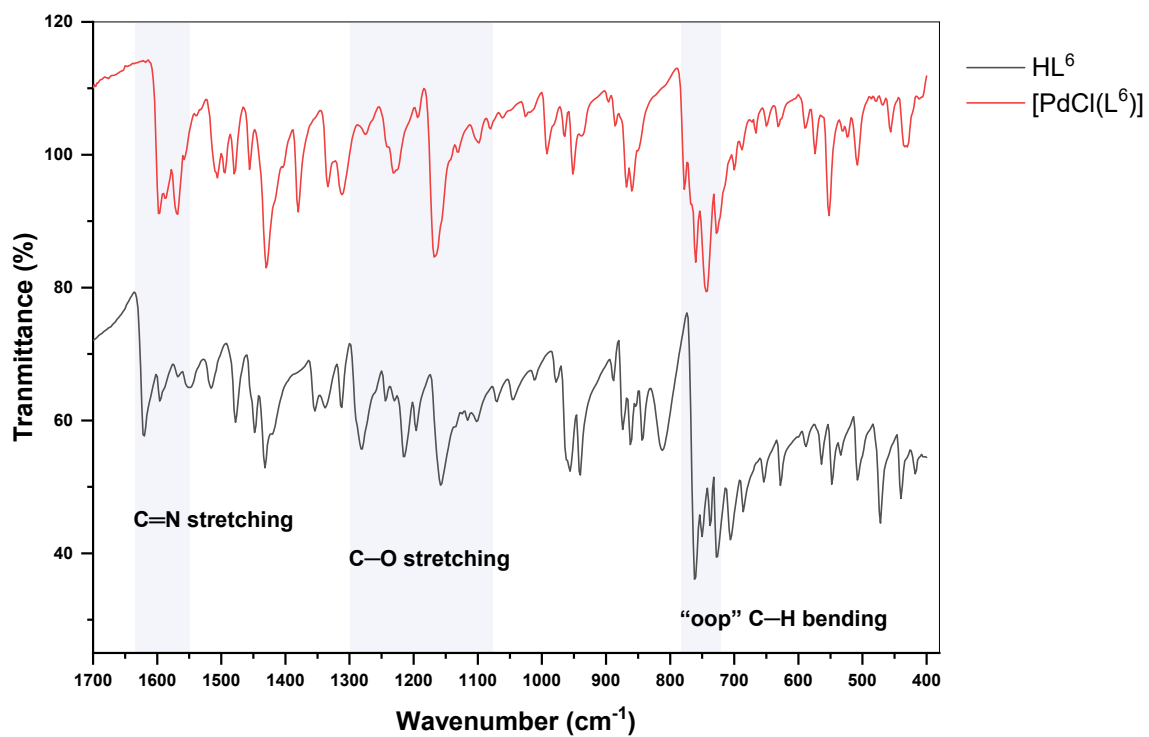

Fig. S15 FT-IR (ATR) spectra of ligand  $\text{HL}^6$  and Pd(II) complex **6**.

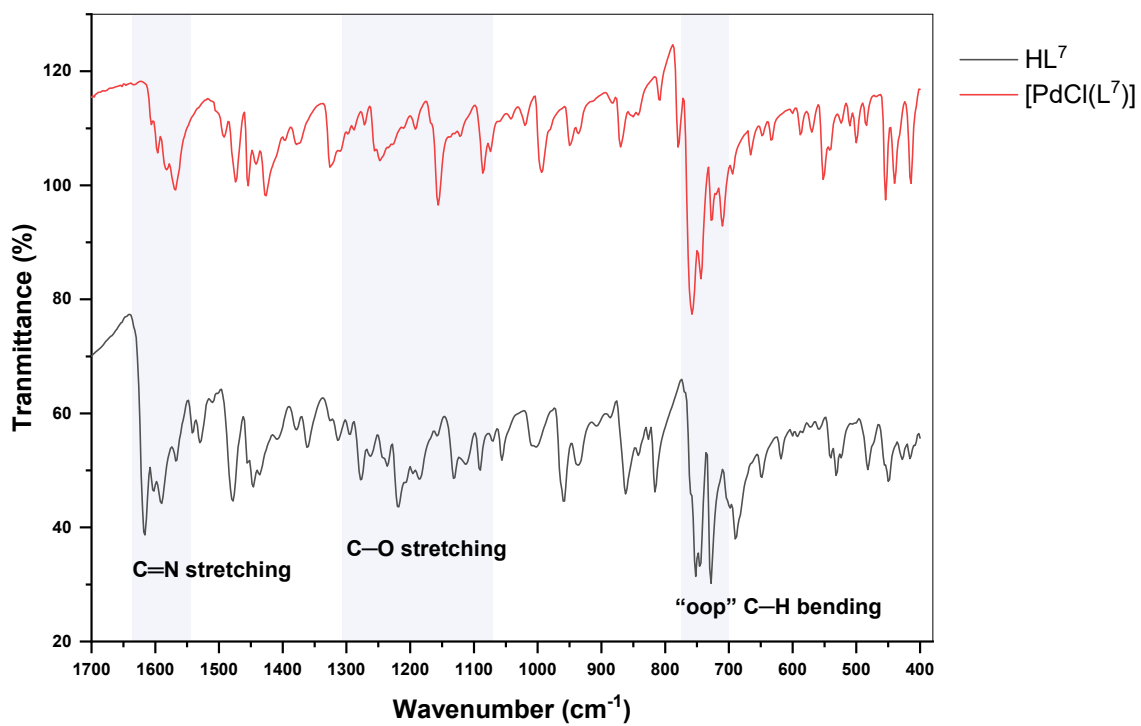

Fig. S16 FT-IR (ATR) spectra of ligand  $\text{HL}^7$  and Pd(II) complex **7**.

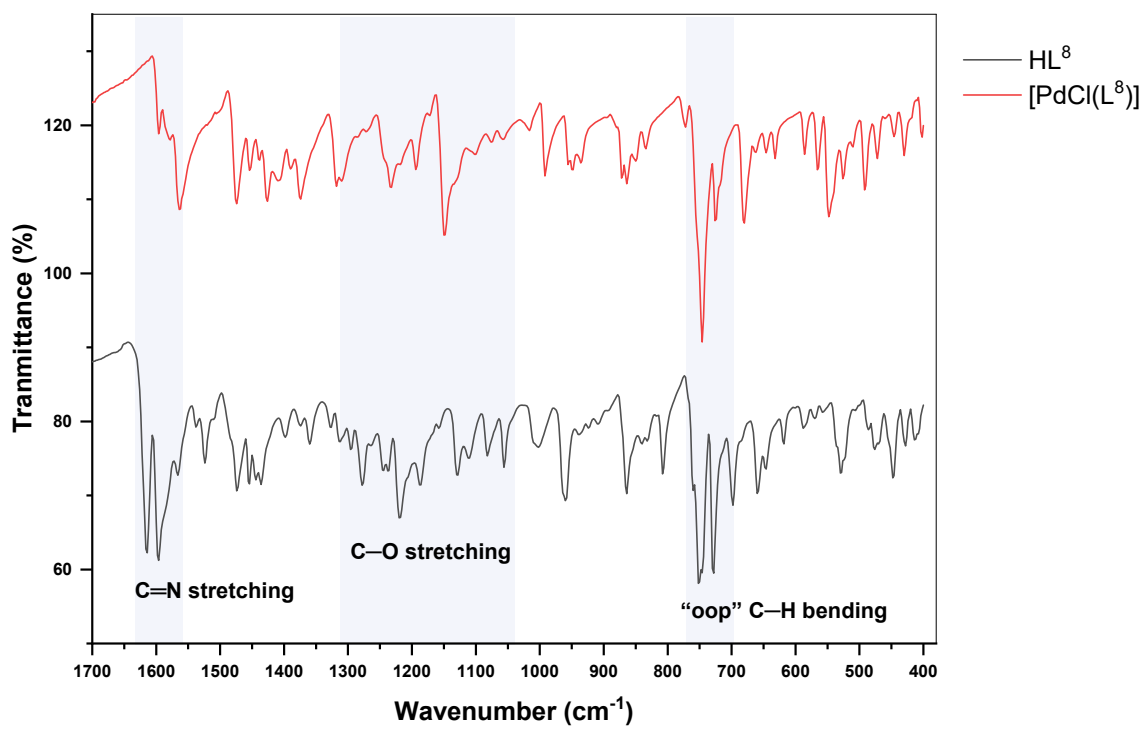

**Fig. S17** FT-IR (ATR) spectra of ligand  $\text{HL}^8$  and Pd(II) complex **8**.

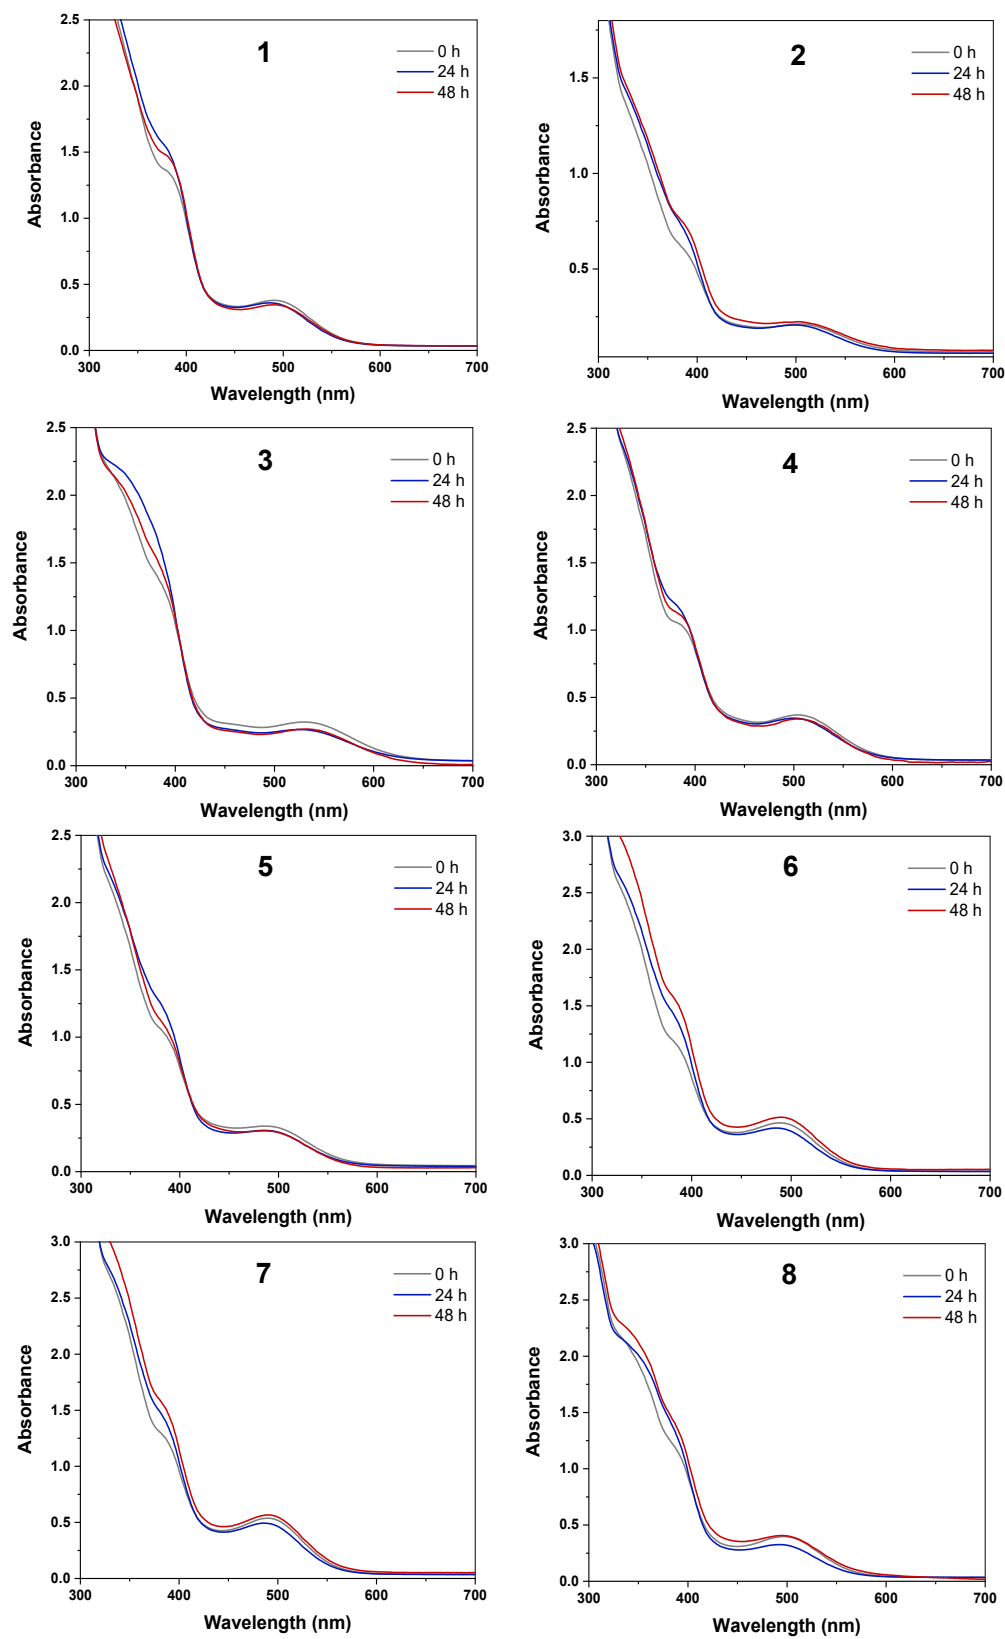

Fig. S18 UV-visible spectra of Pd(II) complexes 1–8 in DMSO at 25°C for 0–48 h.

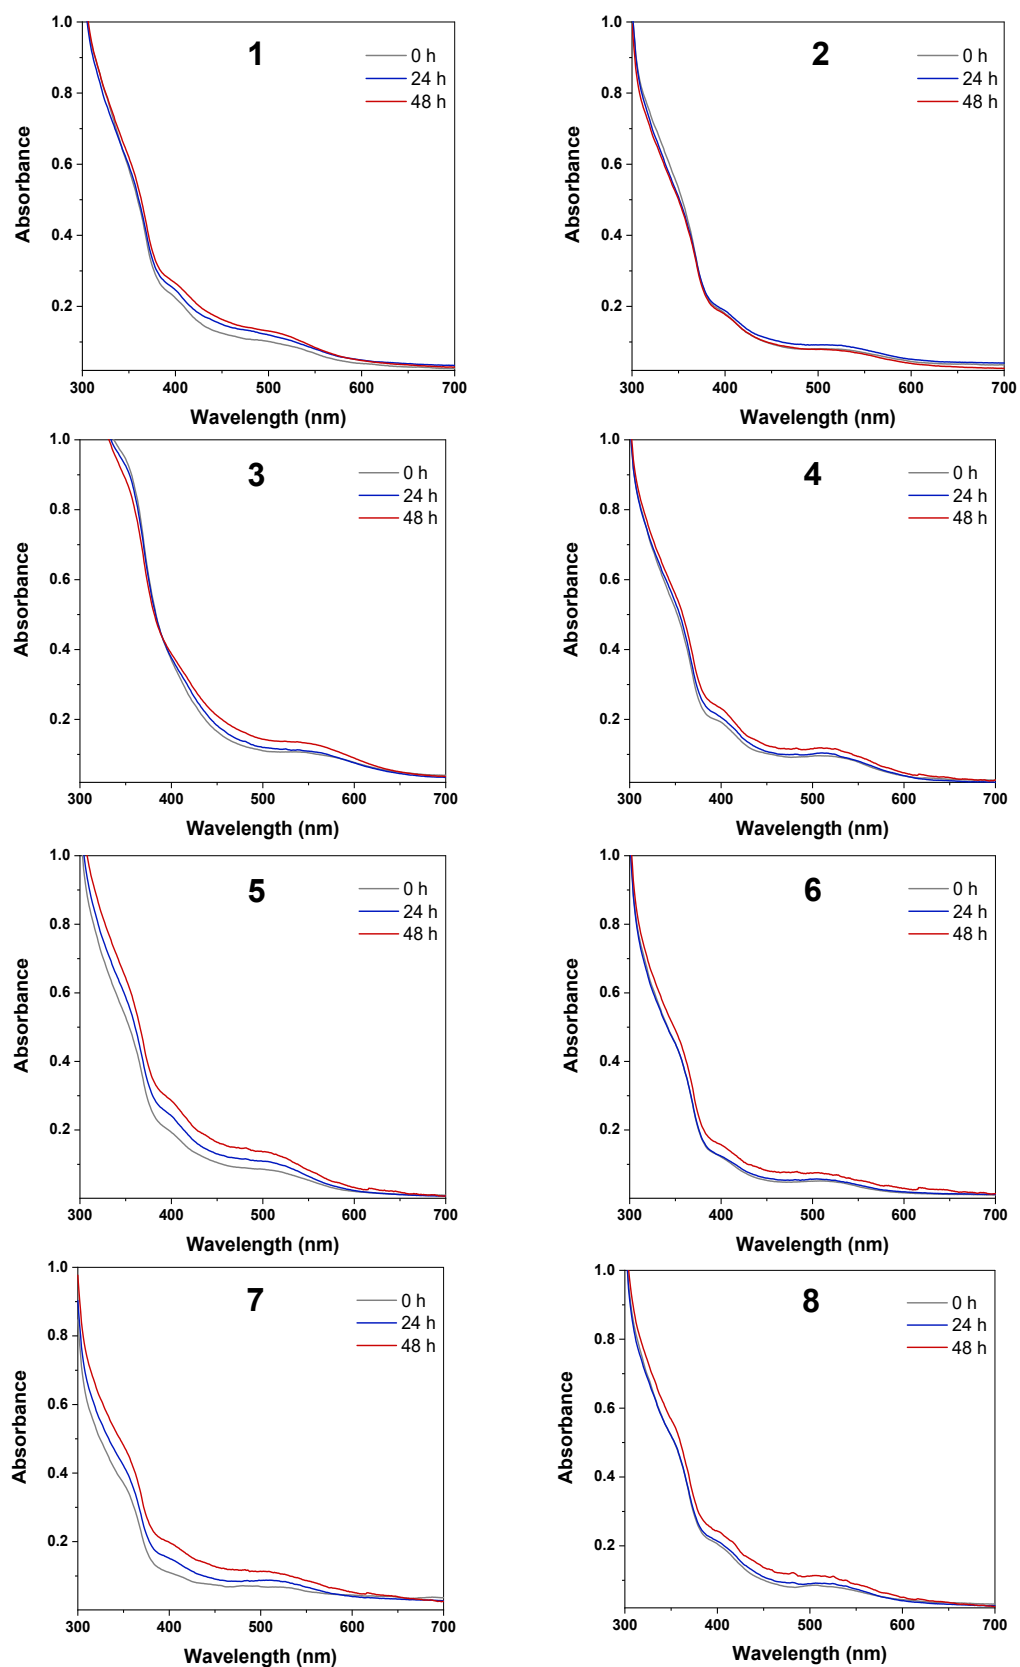

Fig. S19 UV-visible spectra of Pd(II) complexes 1–8 in PBS solution (pH 7.4) at 37°C for 0–48 h.

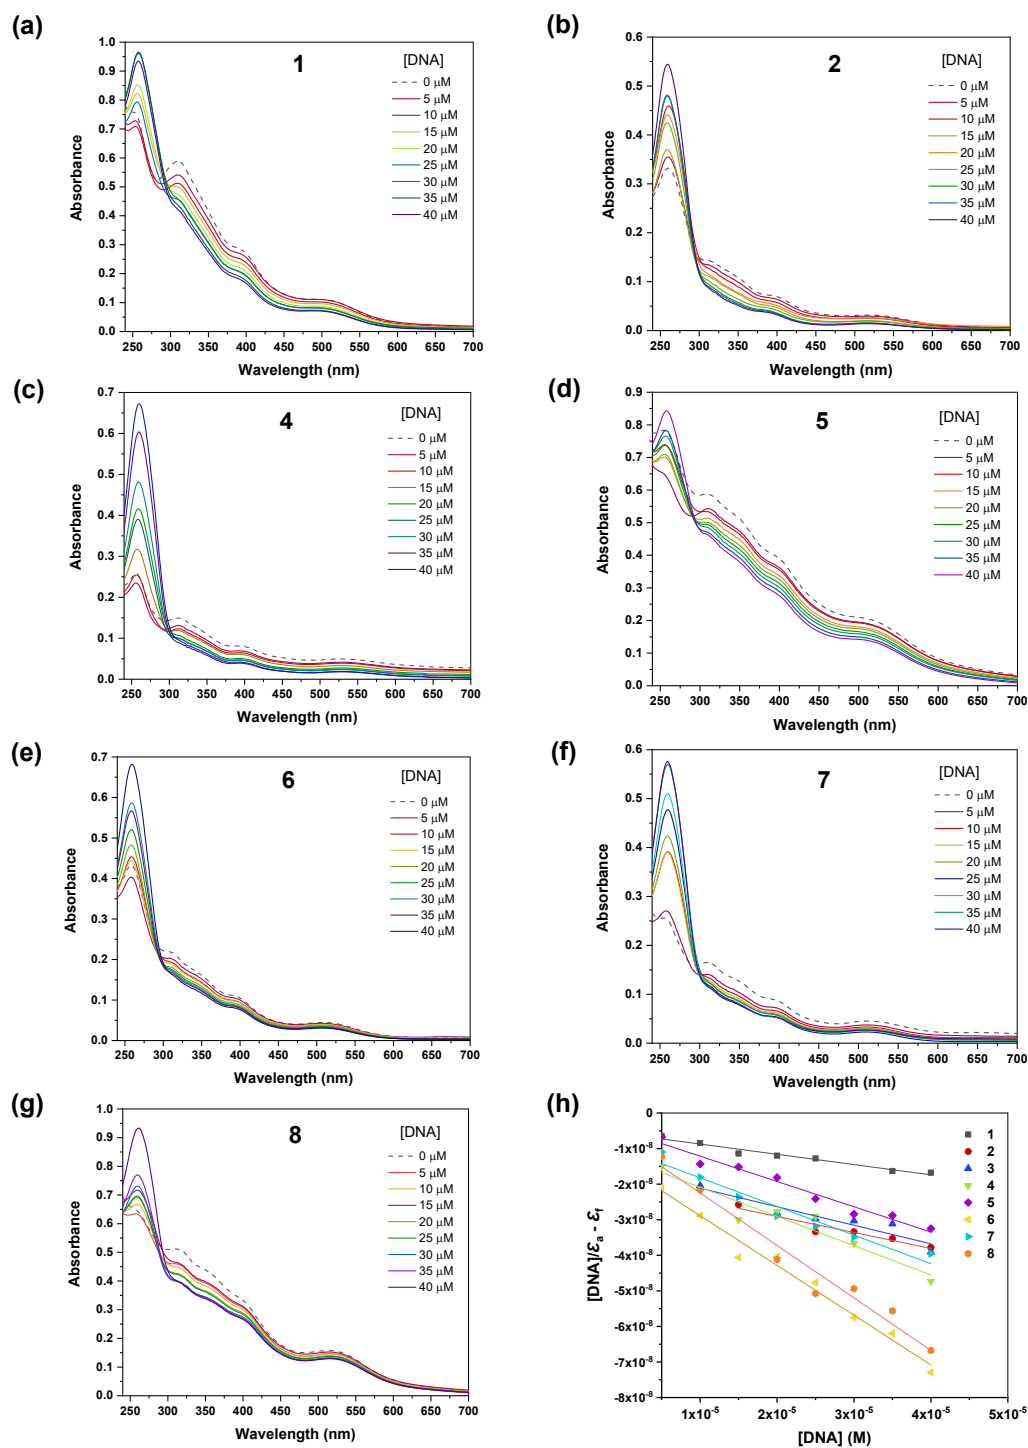

**Fig. S20** UV-visible spectra of Pd(II) complexes ( $50 \mu\text{M}$ ) in the absence and presence of CT-DNA ( $0$ – $40 \mu\text{M}$ ) (a–g). Wolfe-Shimer plot of  $[DNA]$  vs.  $[DNA]/(\epsilon_a - \epsilon_f)$  for determination of the binding constant ( $K_b$ ) for Pd(II) complexes **1**–**8** (h).

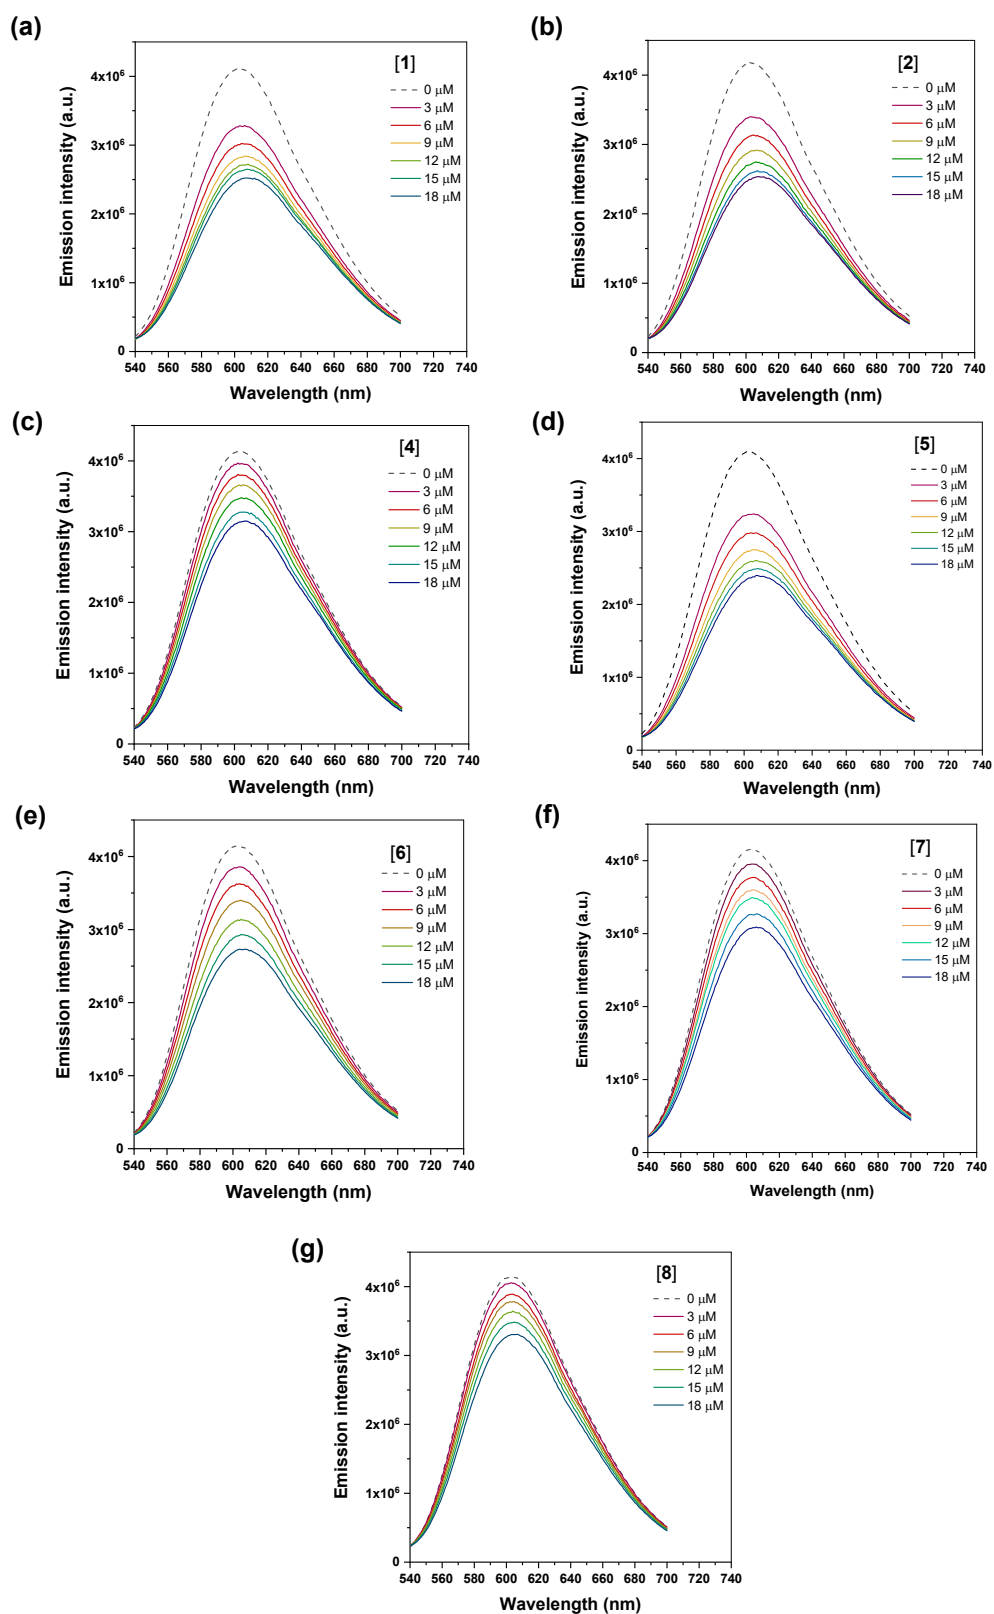

**Fig. S21** Fluorescence quenching spectra of EB-DNA ( $[\text{DNA}] = 10 \mu\text{M}$ ;  $[\text{EB}] = 4 \mu\text{M}$ ;  $\lambda_{\text{ex}} = 525 \text{ nm}$ ;  $\lambda_{\text{em}} = 603 \text{ nm}$ ) in the absence and presence of Pd(II) complexes (0–18  $\mu\text{M}$ ) (a–g).

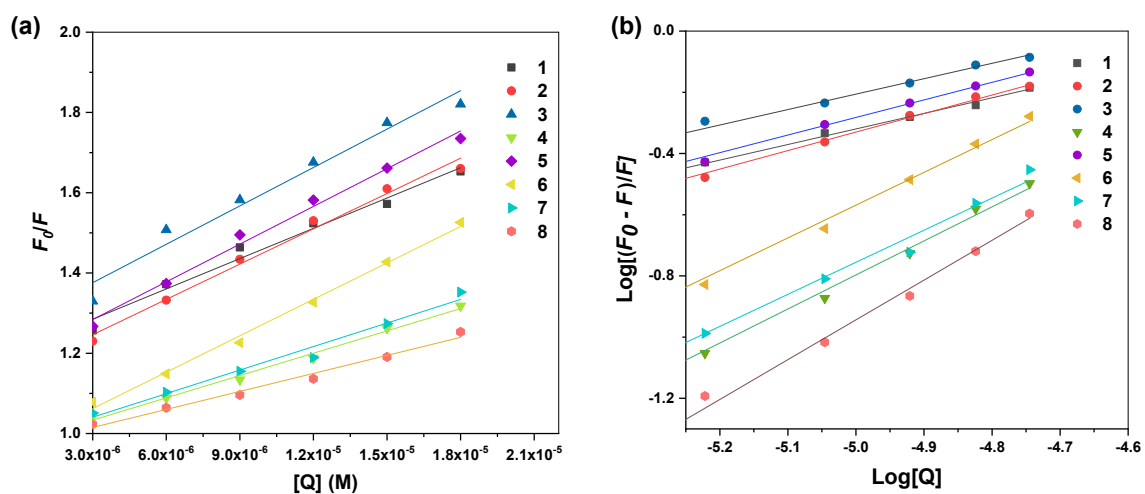

**Fig. S22** Fluorescence quenching profile by 1–8; Stern–Volmer plots of EB–DNA (a), and Scatchard plot of EB–DNA (b).

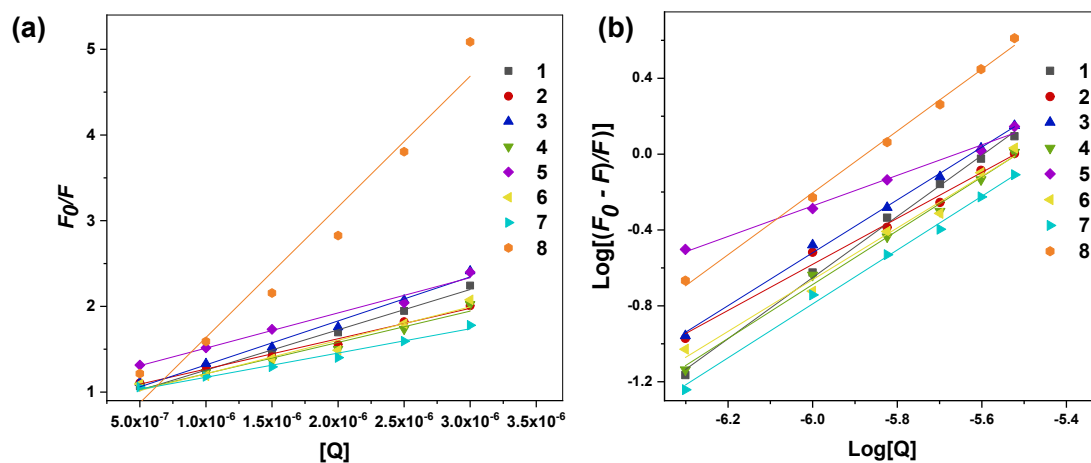

**Fig. S23** Fluorescence quenching profile by complexes 1–8; Stern–Volmer plots of BSA (a), and Scatchard plot of BSA (b).

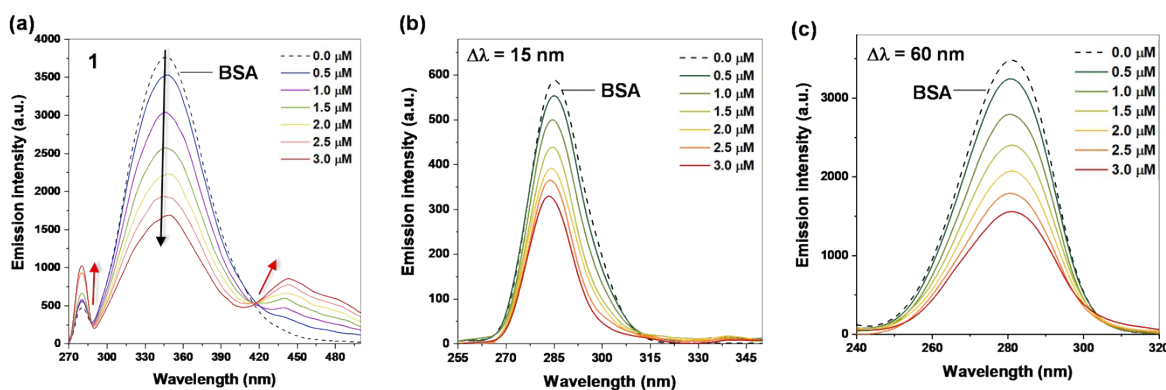

**Fig. S24** Fluorescence quenching spectra of BSA (2  $\mu\text{M}$ ;  $\lambda_{\text{ex}} = 280$  nm;  $\lambda_{\text{em}} = 350$  nm) in the absence and presence of complex 1 (0–3  $\mu\text{M}$ ) (a). Synchronous spectra of BSA (2  $\mu\text{M}$ ) in the presence of increasing concentrations of complex 1 (0–3  $\mu\text{M}$ ) with a wavelength separation of  $\Delta\lambda = 15$  nm (b) and  $\Delta\lambda = 60$  nm (c).

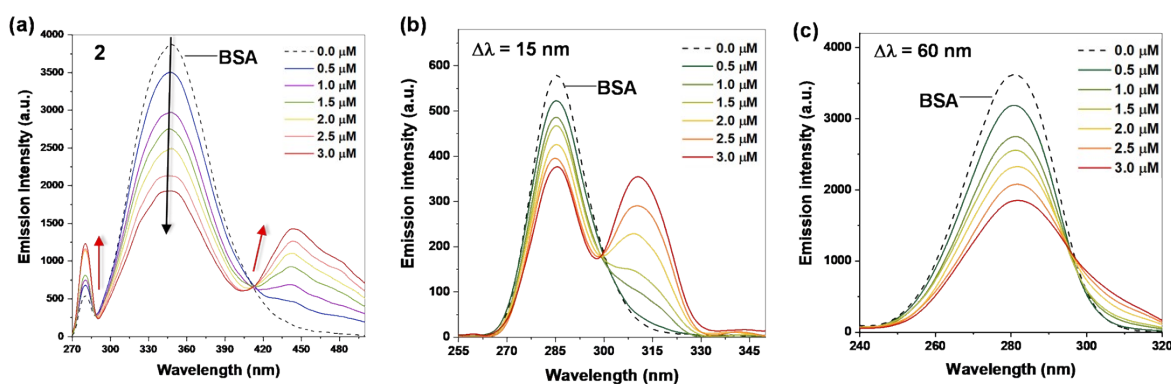

**Fig. S25** Fluorescence quenching spectra of BSA (2  $\mu\text{M}$ ;  $\lambda_{\text{ex}} = 280$  nm;  $\lambda_{\text{em}} = 350$  nm) in the absence and presence of complex 2 (0–3  $\mu\text{M}$ ) (a). Synchronous spectra of BSA (2  $\mu\text{M}$ ) in the presence of increasing concentrations of complex 2 (0–3  $\mu\text{M}$ ) with a wavelength separation of  $\Delta\lambda = 15$  nm (b) and  $\Delta\lambda = 60$  nm (c).



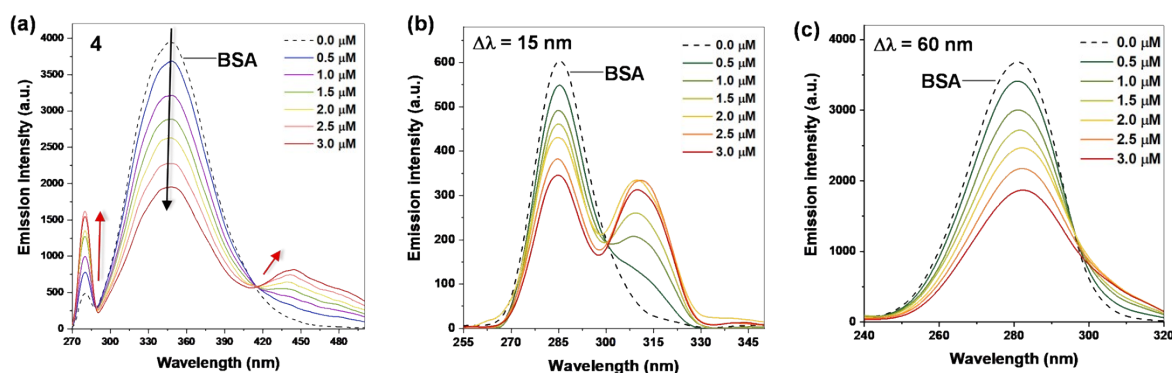

**Fig. S26** Fluorescence quenching spectra of BSA ( $2 \mu\text{M}$ ;  $\lambda_{\text{ex}} = 280 \text{ nm}$ ;  $\lambda_{\text{em}} = 350 \text{ nm}$ ) in the absence and presence of complex **4** ( $0\text{--}3 \mu\text{M}$ ) (a). Synchronous spectra of BSA ( $2 \mu\text{M}$ ) in the presence of increasing concentrations of complex **4** ( $0\text{--}3 \mu\text{M}$ ) with a wavelength separation of  $\Delta\lambda = 15 \text{ nm}$  (b) and  $\Delta\lambda = 60 \text{ nm}$  (c).

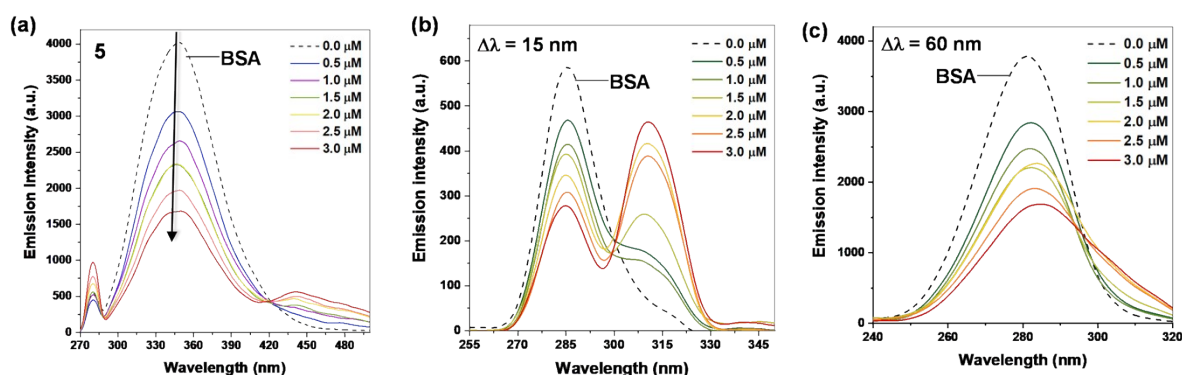

**Fig. S27** Fluorescence quenching spectra of BSA ( $2 \mu\text{M}$ ;  $\lambda_{\text{ex}} = 280 \text{ nm}$ ;  $\lambda_{\text{em}} = 350 \text{ nm}$ ) in the absence and presence of complex **5** ( $0\text{--}3 \mu\text{M}$ ) (a). Synchronous spectra of BSA ( $2 \mu\text{M}$ ) in the presence of increasing concentrations of complex **5** ( $0\text{--}3 \mu\text{M}$ ) with a wavelength separation of  $\Delta\lambda = 15 \text{ nm}$  (b) and  $\Delta\lambda = 60 \text{ nm}$  (c).

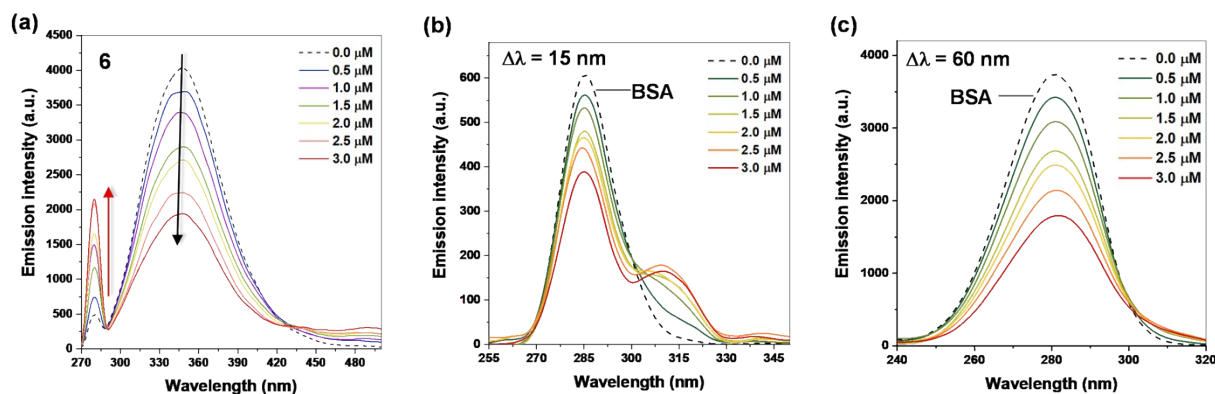

**Fig. S28** Fluorescence quenching spectra of BSA ( $2 \mu\text{M}$ ;  $\lambda_{\text{ex}} = 280 \text{ nm}$ ;  $\lambda_{\text{em}} = 350 \text{ nm}$ ) in the absence and presence of complex **6** ( $0\text{--}3 \mu\text{M}$ ) (a). Synchronous spectra of BSA ( $2 \mu\text{M}$ ) in the presence of increasing concentrations of complex **6** ( $0\text{--}3 \mu\text{M}$ ) with a wavelength separation of  $\Delta\lambda = 15 \text{ nm}$  (b) and  $\Delta\lambda = 60 \text{ nm}$  (c).

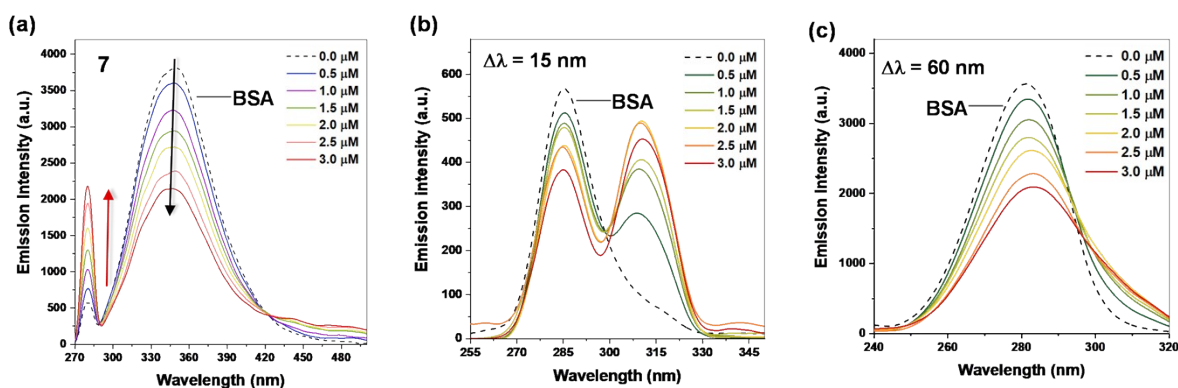

**Fig. S29** Fluorescence quenching spectra of BSA ( $2 \mu\text{M}$ ;  $\lambda_{\text{ex}} = 280 \text{ nm}$ ;  $\lambda_{\text{em}} = 350 \text{ nm}$ ) in the absence and presence of complex **7** ( $0\text{--}3 \mu\text{M}$ ) (a). Synchronous spectra of BSA ( $2 \mu\text{M}$ ) in the presence of increasing concentrations of complex **7** ( $0\text{--}3 \mu\text{M}$ ) with a wavelength separation of  $\Delta\lambda = 15 \text{ nm}$  (b) and  $\Delta\lambda = 60 \text{ nm}$  (c).

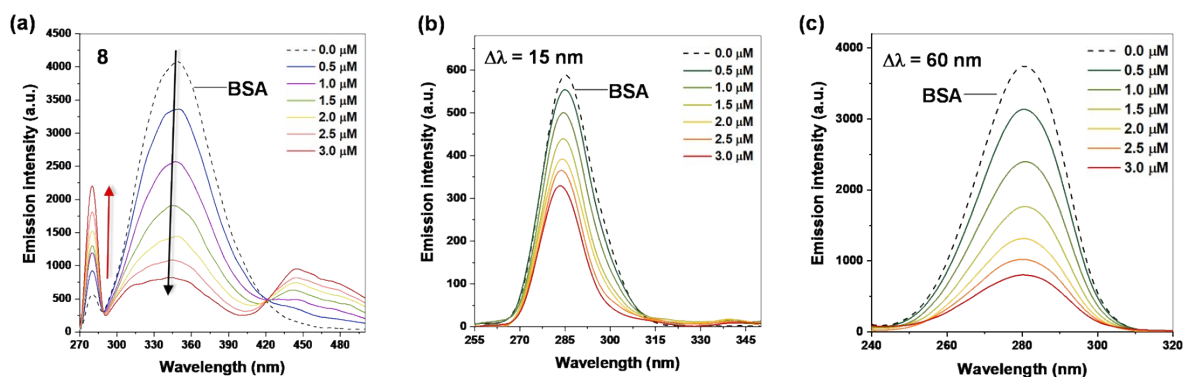

**Fig. S30** Fluorescence quenching spectra of BSA ( $2 \mu\text{M}$ ;  $\lambda_{\text{ex}} = 280 \text{ nm}$ ;  $\lambda_{\text{em}} = 350 \text{ nm}$ ) in the absence and presence of complex **8** ( $0\text{--}3 \mu\text{M}$ ) (a). Synchronous spectra of BSA ( $2 \mu\text{M}$ ) in the presence of increasing concentrations of complex **8** ( $0\text{--}3 \mu\text{M}$ ) with a wavelength separation of  $\Delta\lambda = 15 \text{ nm}$  (b) and  $\Delta\lambda = 60 \text{ nm}$  (c).

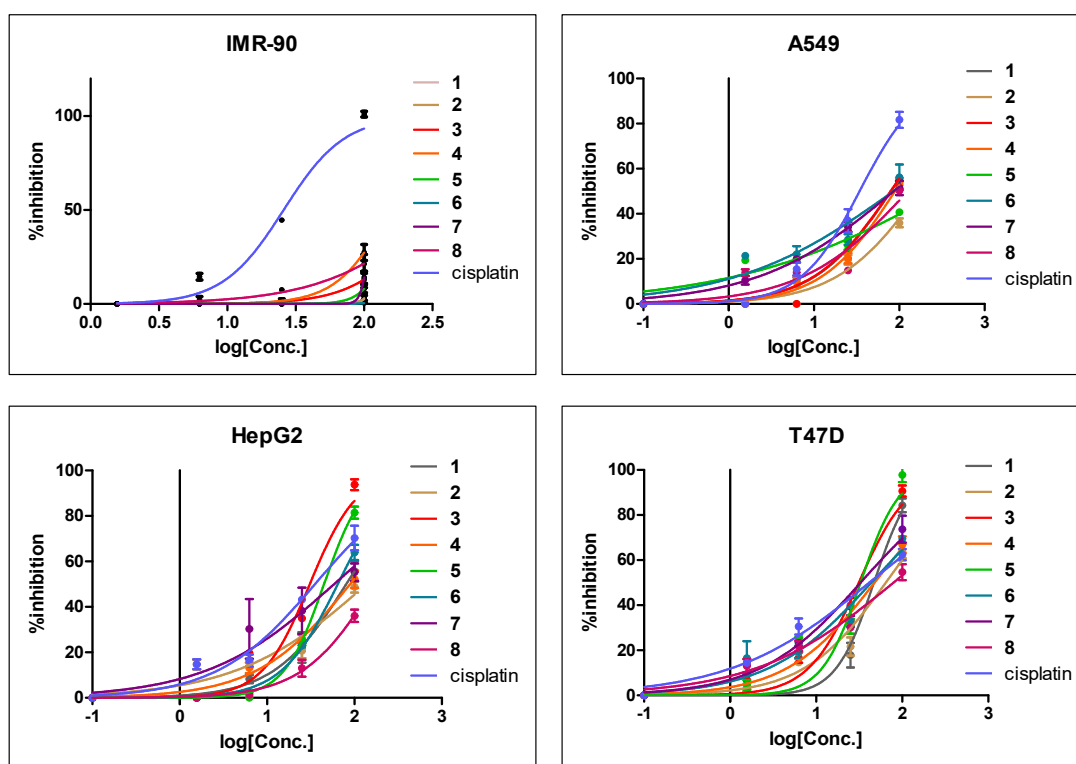

**Fig. S31** Cytotoxicity of Pd(II) complexes **1–8** and cisplatin toward IMR-90, A549, HepG2, and T47D cell lines.  $\text{IC}_{50}$  values were fitted from the plot between %inhibition and  $\log[\text{concentration}]$  using the GraphPad Prism5 software.

**Table S1** Crystallographic data and structure refinement parameters for HL<sup>2</sup>, HL<sup>3</sup>, **1–3**, and **5**

|                            | HL <sup>2</sup>                                   | HL <sup>3</sup>                                                 | <b>1</b>                                                  | <b>2</b>                                              | <b>3</b>                                                                   | <b>5</b>                                                             |
|----------------------------|---------------------------------------------------|-----------------------------------------------------------------|-----------------------------------------------------------|-------------------------------------------------------|----------------------------------------------------------------------------|----------------------------------------------------------------------|
| Empirical formula          | C <sub>21</sub> H <sub>17</sub> N <sub>2</sub> OS | C <sub>21</sub> H <sub>16</sub> N <sub>2</sub> O <sub>2</sub> S | C <sub>20</sub> H <sub>13</sub> ClN <sub>2</sub> OPd<br>S | C <sub>21</sub> H <sub>15</sub> ClN <sub>2</sub> OPdS | 2(C <sub>21</sub> H <sub>15</sub> ClN <sub>2</sub> O <sub>2</sub> Pd<br>S) | C <sub>20</sub> H <sub>11</sub> ClF <sub>2</sub> N <sub>2</sub> OPdS |
| Formula weight             | 345.42                                            | 360.44                                                          | 471.27                                                    | 485.30                                                | 1002.60                                                                    | 507.22                                                               |
| Temperature (K)            | 296.15                                            | 296.15                                                          | 296.15                                                    | 296.15                                                | 296.15                                                                     | 296.15                                                               |
| Crystal system             | Monoclinic                                        | Monoclinic                                                      | Monoclinic                                                | Orthorhombic                                          | Orthorhombic                                                               | Orthorhombic                                                         |
| Space group                | <i>P2<sub>1</sub>/c</i>                           | <i>P2<sub>1</sub>/c</i>                                         | <i>P2<sub>1</sub>/c</i>                                   | <i>Pbca</i>                                           | <i>Pbca</i>                                                                | <i>Pbca</i>                                                          |
| <i>a</i> (Å)               | 10.9409(3)                                        | 10.779(4)                                                       | 10.5645(13)                                               | 13.0960(10)                                           | 12.996(2)                                                                  | 12.4974(3)                                                           |
| <i>b</i> (Å)               | 12.9321(3)                                        | 12.613(4)                                                       | 17.130(3)                                                 | 10.9779(9)                                            | 10.9433(15)                                                                | 11.1274(3)                                                           |
| <i>c</i> (Å)               | 13.1159(4)                                        | 13.596(4)                                                       | 10.1453(14)                                               | 25.673(2)                                             | 26.809(4)                                                                  | 25.9429(8)                                                           |
| <i>α</i> (°)               | 90                                                | 90                                                              | 90                                                        | 90                                                    | 90                                                                         | 90                                                                   |
| <i>β</i> (°)               | 111.9350(10)                                      | 110.290(13)                                                     | 105.873(5)                                                | 90                                                    | 90                                                                         | 90                                                                   |
| <i>γ</i> (°)               | 90                                                | 90                                                              | 90                                                        | 90                                                    | 90                                                                         | 90                                                                   |
| <i>V</i> (Å <sup>3</sup> ) | 1721.41(8)                                        | 1733.8(10)                                                      | 1766.0(4)                                                 | 3691.0(5)                                             | 3812.9(10)                                                                 | 3607.71(17)                                                          |
| <i>Z</i>                   | 4                                                 | 4                                                               | 4                                                         | 8                                                     | 4                                                                          | 8                                                                    |
| <i>F</i> (000)             | 720.7704                                          | 752.8144                                                        | 933.4216                                                  | 1930.8628                                             | 1994.9499                                                                  | 2000                                                                 |

|                                                           |                |                |                |                |                |                |
|-----------------------------------------------------------|----------------|----------------|----------------|----------------|----------------|----------------|
| $D_c$ (g cm <sup>-3</sup> )                               | 1.3289         | 1.3807         | 1.7724         | 1.7465         | 1.7464         | 1.868          |
| $\mu$ (mm <sup>-1</sup> )                                 | 0.199          | 0.205          | 1.332          | 1.277          | 1.243          | 1.326          |
| $\theta$ range (°)                                        | 2.61 to 28.35  | 2.58 to 28.32  | 3.11 to 28.33  | 2.55 to 26.41  | 3.13 to 30.59  | 2.91 to 28.34  |
| Reflections collected                                     | 43327          | 61709          | 49008          | 63511          | 105897         | 153380         |
| Max., min transmission                                    | 0.7457, 0.6566 | 0.7457, 0.6870 | 0.7457, 0.6926 | 0.7454, 0.6209 | 0.7461, 0.6835 | 0.7457, 0.6664 |
| $R_{(\text{int})}$                                        | 0.0842         | 0.0509         | 0.0491         | 0.0759         | 0.0450         | 0.0516         |
| Goodness-of-fit on $F^2$                                  | 1.0574         | 1.0695         | 1.0624         | 1.0393         | 1.0459         | 1.154          |
| Final $R$ indexes [ $I \geq 2\sigma(I)$ ]:<br>$R_1, wR_2$ | 0.0432, 0.0979 | 0.0385, 0.0955 | 0.0265, 0.0644 | 0.0672, 0.1678 | 0.0368, 0.0718 | 0.0299, 0.0619 |
| Final $R$ indexes [all data]: $R_1,$<br>$wR_2$            | 0.0810, 0.1185 | 0.0502, 0.1035 | 0.0342, 0.0693 | 0.0729, 0.1711 | 0.0438, 0.0749 | 0.0357, 0.0643 |
| Largest diff. peak/hole (e Å <sup>-3</sup> )              | 0.2512/-0.3004 | 0.2660/-0.3385 | 0.7172/-0.6565 | 1.4601/-2.0156 | 0.7130/-0.9514 | 0.374/-0.589   |
| CCDC no.                                                  | 2068395        | 2068691        | 2216314        | 2216316        | 2216315        | 2216317        |

---

**Table S2** Selected bond lengths (Å), bond angles (°), and dihedral angles (°) for HL<sup>2</sup>.

| Bond lengths |          | Bond angles |          | Dihedral angles |           |
|--------------|----------|-------------|----------|-----------------|-----------|
| N1–C1        | 1.296(3) | N1–C1–C8    | 120.8(2) | C2–N1–C1–C8     | –176.6(2) |
| N1–C2        | 1.386(3) | N2–C9–C8    | 119.9(2) | N2–C9–C8–C1     | 5.0(3)    |
| N2–C9        | 1.419(2) | N2–C14–C15  | 123.4(2) | C9–N2–C14–C15   | –174.9(2) |
| N2–C14       | 1.282(2) | C9–N2–C14   | 118.6(2) | N2–C14–C15–C16  | 6.7(3)    |
| S1–C1        | 1.749(2) | C15–C16–O1  | 121.7(2) | C14–C15–C16–O1  | –0.7(3)   |
| O1–C16       | 1.360(3) | S1–C1–C8    | 124.0(1) | C9–C8–C1–S1     | 12.4(3)   |

**Table S3** Selected bond lengths (Å), bond angles (°), and dihedral angles (°) for HL<sup>3</sup>.

| Bond lengths |          | Bond angles |          | Dihedral angles |           |
|--------------|----------|-------------|----------|-----------------|-----------|
| N1–C6        | 1.381(2) | N1–C7–C8    | 121.5(1) | C6–N1–C7–C8     | –177.9(1) |
| N1–C7        | 1.298(2) | N2–C13–C8   | 119.9(1) | N2–C13–C8–C7    | 2.6(2)    |
| N2–C13       | 1.415(2) | N2–C14–C15  | 122.8(1) | C13–N2–C14–C15  | –175.9(1) |
| N2–C14       | 1.283(2) | C13–N2–C14  | 118.3(1) | N2–C14–C15–C16  | 6.9(2)    |
| S1–C7        | 1.754(1) | C15–C16–O1  | 122.3(1) | C14–C15–C16–O1  | –1.2(2)   |
| O1–C16       | 1.359(2) | S1–C7–C8    | 123.7(1) | C13–C8–C7–S1    | 10.1(2)   |

**Table S4** Selected bond lengths (Å), bond angles (°), and dihedral angles (°) for complex **1**.

| Bond lengths |          | Bond angles |          | Dihedral angles |           |
|--------------|----------|-------------|----------|-----------------|-----------|
| N1–C7        | 1.299(3) | N1–C7–C6    | 125.9(2) | C15–N2–C14–C13  | –173.2(3) |
| N1–C8        | 1.423(4) | N1–C8–C13   | 121.1(3) | N1–C8–C13–C14   | –4.6(5)   |
| N2–C14       | 1.312(4) | N2–C14–C13  | 125.9(3) | C8–N1–C7–C6     | 165.1(2)  |
| N2–C15       | 1.406(3) | C8–N1–C7    | 118.8(2) | N1–C7–C6–C1     | –17.4(4)  |
| S1–C14       | 1.726(3) | C6–C1–O1    | 124.9(2) | C7–C6–C1–O1     | 7.7(4)    |

|        |           |            |          |               |           |
|--------|-----------|------------|----------|---------------|-----------|
| O1–C1  | 1.312(3)  | S1–C14–C13 | 119.6(2) | C8–C13–C14–S1 | –150.3(3) |
| Pd1–N1 | 1.994(2)  | N1–Pd1–N2  | 88.55(8) | O1–Pd1–N1–C8  | –144.2(2) |
| Pd1–N2 | 2.027(2)  | N2–Pd1–C11 | 95.38(6) | N2–Pd1–O1–C1  | 48.4(5)   |
| Pd1–O1 | 1.981(2)  | O1–Pd1–C11 | 87.74(6) | N2–Pd1–N1–C7  | –139.2(2) |
| Pd1–C1 | 2.3286(8) | O1–Pd1–N1  | 90.63(8) | N2–Pd1–N1–C8  | 47.1(2)   |

**Table S5** Selected bond lengths (Å), bond angles (°), and dihedral angles (°) for complex **2**.

| Bond lengths |          | Bond angles |          | Dihedral angles |           |
|--------------|----------|-------------|----------|-----------------|-----------|
| N1–C1        | 1.40(1)  | N1–C7–C8    | 125.6(7) | C1–N1–C7–C8     | 174.5(7)  |
| N1–C7        | 1.30(1)  | N2–C13–C8   | 122.1(7) | N2–C13–C8–C7    | –4(1)     |
| N2–C13       | 1.412(9) | N2–C14–C15  | 126.3(7) | C13–N2–C14–C15  | –166.0(7) |
| N2–C14       | 1.305(9) | C13–N2–C14  | 119.0(6) | N2–C14–C15–C20  | 36.0(5)   |
| S1–C7        | 1.741(8) | C15–C20–O1  | 123.3(6) | C14–C15–C20–O1  | –6(1)     |
| O1–C20       | 1.311(9) | S1–C7–C8    | 119.7(6) | C13–C8–C7–S1    | 156.9(7)  |
| Pd1–N1       | 2.029(7) | N1–Pd1–N2   | 88.2(3)  | O1–Pd1–N2–C13   | 145.8(5)  |
| Pd1–N2       | 1.994(6) | N1–Pd1–C11  | 95.3(2)  | N1–Pd1–O1–C20   | –50(1)    |
| Pd1–O1       | 1.973(5) | O1–Pd1–C11  | 88.3(2)  | N1–Pd1–N2–C13   | –46.8(5)  |
| Pd1–C1       | 2.331(2) | O1–Pd1–N2   | 91.0(2)  | N1–Pd1–N2–C14   | 141.6(6)  |

**Table S6** Selected bond lengths (Å), bond angles (°), and dihedral angles (°) for complex **3**.

| Bond lengths |          | Bond angles |          | Dihedral angles |           |
|--------------|----------|-------------|----------|-----------------|-----------|
| N1–C1        | 1.405(4) | N1–C7–C8    | 126.2(2) | C1–N1–C7–C8     | 175.6(3)  |
| N1–C7        | 1.308(3) | N2–C13–C8   | 120.6(2) | N2–C13–C8–C7    | –3.5(4)   |
| N2–C13       | 1.420(3) | N2–C14–C15  | 125.4(2) | C13–N2–C14–C15  | –168.8(2) |
| N2–C14       | 1.297(3) | C13–N2–C14  | 118.2(2) | N2–C14–C15–C20  | 19.8(4)   |

|        |           |            |          |                |          |
|--------|-----------|------------|----------|----------------|----------|
| S1–C7  | 1.737(3)  | C15–C20–O1 | 124.7(2) | C14–C15–C20–O1 | –4.9(4)  |
| O1–C20 | 1.317(3)  | S1–C7–C8   | 119.7(2) | C13–C8–C7–S1   | 157.4(2) |
| Pd1–N1 | 2.035(2)  | N1–Pd1–N2  | 88.57(9) | O1–Pd1–N2–C13  | 145.1(2) |
| Pd1–N2 | 1.985(2)  | N1–Pd1–Cl1 | 95.26(7) | N1–Pd1–O1–C20  | –45.1(5) |
| Pd1–O1 | 1.984(2)  | O1–Pd1–Cl1 | 88.61(6) | N1–Pd1–N2–C13  | –47.4(2) |
| Pd1–Cl | 2.3322(7) | O1–Pd1–N2  | 90.37(8) | N1–Pd1–N2–C14  | 139.4(2) |

**Table S7** Selected bond lengths (Å), bond angles (°), and dihedral angles (°) for complex **5**.

| Bond lengths |           | Bond angles |          | Dihedral angles |           |
|--------------|-----------|-------------|----------|-----------------|-----------|
| N1–C1        | 1.401(3)  | N1–C7–C8    | 125.7(2) | C1–N1–C7–C8     | –174.6(2) |
| N1–C7        | 1.311(3)  | N2–C13–C8   | 121.1(2) | N2–C13–C8–C7    | 2.1(4)    |
| N2–C13       | 1.428(3)  | N2–C14–C15  | 125.4(2) | C13–N2–C14–C15  | 166.6(2)  |
| N2–C14       | 1.288(3)  | C13–N2–C14  | 118.8(2) | N2–C14–C15–C16  | –17.6(4)  |
| S1–C7        | 1.729(2)  | C15–C16–O1  | 126.6(2) | C14–C15–C16–O1  | 4.6(4)    |
| O1–C16       | 1.304(3)  | S1–C7–C8    | 120.1(2) | C13–C8–C7–S1    | –155.6(2) |
| Pd1–N1       | 2.029(2)  | N1–Pd1–N2   | 87.81(8) | O1–Pd1–N2–C13   | –143.7(3) |
| Pd1–N2       | 1.984(2)  | N1–Pd1–Cl1  | 94.76(6) | N1–Pd1–O1–C16   | 39.8(4)   |
| Pd1–O1       | 1.997(2)  | O1–Pd1–Cl1  | 89.87(5) | N1–Pd1–N2–C13   | 48.4(2)   |
| Pd1–Cl       | 2.3263(7) | O1–Pd1–N2   | 90.13(8) | N1–Pd1–N2–C14   | –136.8(2) |



**Table S8** Free energy of binding of the complexes with biomolecules.

| Complex  | Free energy of binding (kcal mol <sup>-1</sup> ) <sup>a</sup> |                    |                    |
|----------|---------------------------------------------------------------|--------------------|--------------------|
|          | DNA (PDB ID: 1BNA)                                            | DNA (PDB ID: 1Z3F) | BSA (PDB ID: 4F5S) |
| <b>3</b> | -9.07                                                         | -8.49              | -9.40              |
| <b>5</b> | -7.79                                                         | -7.38              | -7.97              |

<sup>a</sup>Best complex pose according to Autodock**Table S9** Active site residues of DNA and BSA involved in non-bonded interactions with the complexes.

| Complex  | Active site residues          |                            |                                                              |
|----------|-------------------------------|----------------------------|--------------------------------------------------------------|
|          | DNA (PDB ID: 1BNA)            | DNA (PDB ID: 1Z3F)         | BSA (PDB ID: 4F5S)                                           |
| <b>3</b> | DT8, DT19, DT20               | DG2, DC1, DC5, DG6         | Pro117, Leu115, Lys144, Ile181,<br>Arg185, Arg144, His185    |
| <b>5</b> | DT7, DC9, DA18,<br>DT19, DT20 | DG2, DC1, DC5, DG6,<br>DA3 | Pro110, Asp108, Arg458,<br>Glu424, His145, Arg193,<br>Arg196 |

| Ligand          | SI <sup>b</sup> |             |             |        |      |        |      |
|-----------------|-----------------|-------------|-------------|--------|------|--------|------|
|                 | A549            | HepG-2      | T47D        | IMR-90 | A549 | HepG-2 | T47D |
| HL <sup>1</sup> | >100            | >100        | >100        | >100   | ~1   | ~1     | ~1   |
| HL <sup>2</sup> | >100            | 68.6 ± 7.6  | >100        | >100   | ~1   | 1.46   | ~1   |
| HL <sup>3</sup> | >100            | 87.3 ± 13.5 | 76.8 ± 6.0  | >100   | ~1   | 1.15   | 1.30 |
| HL <sup>4</sup> | >100            | 46.3 ± 4.1  | >100        | >100   | ~1   | 2.16   | ~1   |
| HL <sup>5</sup> | >100            | >100        | 51.9 ± 1.8  | >100   | ~1   | ~1     | 1.93 |
| HL <sup>6</sup> | >100            | 44.9 ± 6.4  | 38.7 ± 0.5  | >100   | ~1   | 2.23   | 2.58 |
| HL <sup>7</sup> | >100            | 50.3 ± 3.4  | 32.2 ± 10.8 | >100   | ~1   | 1.99   | 3.10 |
| HL <sup>8</sup> | >100            | 47.2 ± 0.9  | 46.2 ± 21.6 | >100   | ~1   | 2.19   | 2.16 |

**Table S10** IC<sub>50</sub> values in different human cancer and normal cell lines (48 h) of Schiff base ligands.
